# Supplementary material for: Early Feeding Factors and Eating Behaviors among Children Aged 1–3: A Cross-Sectional Study
Source: MDPI journal article supplement (doi:10.3390/nu14112279), 2022-05-29
Supplement: s1 [file s1]

## Article

# Early Feeding Factors and Eating Behaviors Among Children Aged 1-3: A Cross-Sectional Study

Daria Masztalerz-Kozubek, Monika A. Zielinska-Pukos\* and Jadwiga Hamulka

**Table S1.** Component variables in k-means analysis – early feeding pattern.

| Variable                      | Early feeding pattern (%) |                    |                       | p-value |
|-------------------------------|---------------------------|--------------------|-----------------------|---------|
|                               | Longer ABF<br>(n=174)     | Formula<br>(n=160) | Longer EBF<br>(n=133) |         |
| <b>Current breastfeeding:</b> | yes<br>100%               | no<br>100%         | no<br>100%            | ≤0.001  |
| <b>EBF duration (months):</b> |                           |                    |                       |         |
| never BF/EBF <1               | 23.0                      | 85.0               | 0.0                   | ≤0.001  |
| 1-4                           | 13.2                      | 15.0               | 21.0                  |         |
| 5-7                           | 63.8                      | 0.0                | 79.0                  |         |
| <b>Age at CFI (months):</b>   |                           |                    |                       |         |
| <4                            | 2.9                       | 29.4               | 1.5                   | ≤0.001  |
| 4-6                           | 86.8                      | 69.4               | 88.7                  |         |
| ≥ 7                           | 10.3                      | 1.2                | 9.8                   |         |

ABF – any breastfeeding; BF – breastfeeding; EBF – exclusive breastfeeding; CFI – complementary feeding introduction

**Table S2.** Component variables in k-means analysis – types of complementary food pattern.

| Frequency of consumption of selected foods<br>during the first 3 months of complementary feeding | Types of complementary food pattern (%) |                    | p-value |
|--------------------------------------------------------------------------------------------------|-----------------------------------------|--------------------|---------|
|                                                                                                  | Homemade (n=257)                        | Commercial (n=210) |         |
| <b>Commercial soup/dinner jars:</b>                                                              |                                         |                    |         |
| never or almost never                                                                            | 56.9                                    | 1.9                | ≤0.001  |
| once a month or less                                                                             | 20.2                                    | 2.9                |         |
| few times per month                                                                              | 20.2                                    | 21.4               |         |
| few times per week                                                                               | 2.3                                     | 45.7               |         |
| everyday                                                                                         | 0.4                                     | 25.2               |         |
| few times per day                                                                                | 0.0                                     | 2.9                |         |
| I don't remember                                                                                 | 0.0                                     | 0.0                |         |
| <b>Commercial baby cereals:</b>                                                                  |                                         |                    |         |
| never or almost never                                                                            | 67.7                                    | 11.4               | ≤0.001  |
| once a month or less                                                                             | 15.2                                    | 6.2                |         |
| few times per month                                                                              | 10.5                                    | 18.1               |         |
| few times per week                                                                               | 4.7                                     | 40.0               |         |
| everyday                                                                                         | 1.9                                     | 22.4               |         |
| few times per day                                                                                | 0.0                                     | 1.9                |         |
| I don't remember                                                                                 | 0.0                                     | 0.0                |         |
| <b>Commercial fruit jars:</b>                                                                    |                                         |                    |         |
| never or almost never                                                                            | 40.8                                    | 2.4                | ≤0.001  |
| once a month or less                                                                             | 21.4                                    | 1.9                |         |
| few times per month                                                                              | 25.7                                    | 22.9               |         |
| few times per week                                                                               | 11.7                                    | 49.0               |         |
| everyday                                                                                         | 0.4                                     | 20.9               |         |
| few times per day                                                                                | 0.0                                     | 2.4                |         |
| I don't remember                                                                                 | 0.0                                     | 0.5                |         |
| <b>Commercial baby juices/bevereges:</b>                                                         |                                         |                    |         |
| never or almost never                                                                            | 0.4                                     | 7.6                | ≤0.001  |
| once a month or less                                                                             | 0.8                                     | 5.2                |         |
| few times per month                                                                              | 0.4                                     | 1.9                |         |
| few times per week                                                                               | 0.0                                     | 1.0                |         |
| everyday                                                                                         | 0.0                                     | 0.5                |         |
| few times per day                                                                                | 95.3                                    | 79.0               |         |
| I don't remember                                                                                 | 3.1                                     | 4.8                |         |
| <b>Commercial tea for babies:</b>                                                                |                                         |                    |         |
| never or almost never                                                                            | 98.8                                    | 89.0               | ≤0.001  |
| once a month or less                                                                             | 0.4                                     | 1.9                |         |
| few times per month                                                                              | 0.8                                     | 4.8                |         |
| few times per week                                                                               | 0.0                                     | 2.9                |         |
| everyday                                                                                         | 0.0                                     | 0.9                |         |

|                   |     |     |
|-------------------|-----|-----|
| few times per day | 0.0 | 0.5 |
| I don't remember  | 0.0 | 0.0 |

**Table S2.** Component variables in k-means analysis – types of complementary food pattern – *cont.*

| Frequency of consumption of selected foods<br>during the first 3 months of complementary feeding | Types of complementary food pattern (%) |                    | p-value |
|--------------------------------------------------------------------------------------------------|-----------------------------------------|--------------------|---------|
|                                                                                                  | Homemade (n=257)                        | Commercial (n=210) |         |
| <b>Homemade meals cooked especially for baby:</b>                                                |                                         |                    |         |
| never or almost never                                                                            | 15.9                                    | 6.7                | ≤0.001  |
| once a month or less                                                                             | 9.3                                     | 3.8                |         |
| few times per month                                                                              | 19.5                                    | 13.8               |         |
| few times per week                                                                               | 17.9                                    | 37.6               |         |
| everyday                                                                                         | 23.4                                    | 29.0               |         |
| few times per day                                                                                | 13.6                                    | 8.1                |         |
| I don't remember                                                                                 | 0.4                                     | 1.0                |         |
| <b>Family meals adjusted for baby:</b>                                                           |                                         |                    |         |
| never or almost never                                                                            | 2.7                                     | 11.4               | ≤0.001  |
| once a month or less                                                                             | 1.6                                     | 6.2                |         |
| few times per month                                                                              | 5.8                                     | 19.1               |         |
| few times per week                                                                               | 15.6                                    | 32.9               |         |
| everyday                                                                                         | 37.0                                    | 24.3               |         |
| few times per day                                                                                | 34.2                                    | 5.2                |         |
| I don't remember                                                                                 | 3.1                                     | 0.9                |         |
| <b>Family meals not adjusted for baby:</b>                                                       |                                         |                    |         |
| never or almost never                                                                            | 77.4                                    | 73.8               | 0.930   |
| once a month or less                                                                             | 10.9                                    | 13.8               |         |
| few times per month                                                                              | 6.2                                     | 5.7                |         |
| few times per week                                                                               | 2.7                                     | 3.3                |         |
| everyday                                                                                         | 1.2                                     | 1.0                |         |
| few times per day                                                                                | 0.4                                     | 1.0                |         |
| I don't remember                                                                                 | 1.2                                     | 1.4                |         |

**Table S3.** Component variables in k-means analysis – mealtime environment pattern.

| Frequency of meals consumption in a given way | Mealtime environment pattern (%) |                  |                | p-value |
|-----------------------------------------------|----------------------------------|------------------|----------------|---------|
|                                               | Distracted (n=55)                | Separate (n=115) | Family (n=297) |         |
| In the same time than other family members:   |                                  |                  |                |         |
| never or almost never                         | 3.6                              | 22.6             | 0.0            | ≤0.001  |
| occasionally                                  | 34.6                             | 70.4             | 0.3            |         |
| often                                         | 38.2                             | 5.2              | 39.1           |         |
| always/almost always                          | 21.8                             | 0.0              | 60.6           |         |
| I don't remember                              | 1.8                              | 1.8              | 0.0            |         |
| Separately from other family members:         |                                  |                  |                |         |
| never or almost never                         | 10.9                             | 1.7              | 18.9           | ≤0.001  |
| occasionally                                  | 34.6                             | 4.4              | 66.0           |         |
| often                                         | 52.7                             | 60.9             | 13.8           |         |
| always/almost always                          | 1.8                              | 33.0             | 0.3            |         |
| I don't remember                              | 0.0                              | 0.0              | 1.0            |         |
| During watching TV:                           |                                  |                  |                |         |
| never or almost never                         | 52.7                             | 87.0             | 94.3           | ≤0.001  |
| occasionally                                  | 30.9                             | 11.3             | 4.7            |         |
| often                                         | 12.7                             | 1.7              | 1.0            |         |
| always/almost always                          | 3.7                              | 0.0              | 0.0            |         |
| I don't remember                              | 0.0                              | 0.0              | 0.0            |         |
| When distracted:                              |                                  |                  |                |         |
| never or almost never                         | 0.0                              | 91.3             | 97.6           | ≤0.001  |
| occasionally                                  | 70.9                             | 8.7              | 2.4            |         |
| often                                         | 29.1                             | 0.0              | 0.0            |         |
| always/almost always                          | 0.0                              | 0.0              | 0.0            |         |
| I don't remember                              | 0.0                              | 0.0              | 0.0            |         |
| During playtime:                              |                                  |                  |                |         |
| never or almost never                         | 36.4                             | 91.3             | 89.2           | ≤0.001  |
| occasionally                                  | 40.0                             | 4.3              | 9.4            |         |
| often                                         | 23.6                             | 2.6              | 1.4            |         |
| always/almost always                          | 0.0                              | 0.9              | 0.0            |         |
| I don't remember                              | 0.0                              | 0.9              | 0.0            |         |
| During sleeping:                              |                                  |                  |                |         |
| never or almost never                         | 89.1                             | 95.7             | 99.0           | 0.002   |
| occasionally                                  | 7.3                              | 2.6              | 0.7            |         |
| often                                         | 3.6                              | 1.7              | 0.3            |         |
| always/almost always                          | 0.0                              | 0.0              | 0.0            |         |

|                                     |      |      |      |        |
|-------------------------------------|------|------|------|--------|
| I don't remember                    | 0.0  | 0.0  | 0.0  |        |
| <b>Until child's finished meal:</b> |      |      |      |        |
| never or almost never               | 60.0 | 88.7 | 94.0 |        |
| occasionally                        | 25.5 | 7.8  | 4.7  |        |
| often                               | 9.1  | 3.5  | 0.3  | ≤0.001 |
| always/almost always                | 3.6  | 0.0  | 0.3  |        |
| I don't remember                    | 1.8  | 0.0  | 0.7  |        |

**Table S4.** Birth-related factors, maternal BMI and ever formula feeding according to CEBQ results.

| Variable                        | n   | %    | CEBQ subscales            |             |             |             |             |             |             |             |  |
|---------------------------------|-----|------|---------------------------|-------------|-------------|-------------|-------------|-------------|-------------|-------------|--|
|                                 |     |      | FR                        | EOE         | EF          | DD          | SR          | SE          | EUE         | FF          |  |
| Pregnancy duration:             |     |      |                           |             |             |             |             |             |             |             |  |
| preterm                         | 42  | 9.0  | 1.88 ± 0.63               | 1.49 ± 0.59 | 3.39 ± 0.79 | 2.62 ± 0.72 | 3.11 ± 0.83 | 2.64 ± 0.62 | 2.75 ± 1.10 | 2.73 ± 0.87 |  |
| term                            | 425 | 91.0 | 2.06 ± 0.74               | 1.44 ± 0.50 | 3.55 ± 0.74 | 2.76 ± 0.88 | 2.90 ± 0.62 | 2.78 ± 0.61 | 2.57 ± 0.97 | 2.60 ± 0.90 |  |
| p-value                         |     |      | 0.123                     | 0.856       | 0.276       | 0.440       | 0.114       | 0.135       | 0.364       | 0.446       |  |
| Birthweight to gestational age: |     |      |                           |             |             |             |             |             |             |             |  |
| SGA                             | 17  | 3.6  | 1.99 ± 0.58               | 1.54 ± 0.63 | 3.50 ± 0.94 | 2.90 ± 0.77 | 3.25 ± 0.62 | 2.93 ± 0.60 | 2.90 ± 1.02 | 2.46 ± 0.80 |  |
| AGA                             | 360 | 77.1 | 2.05 ± 0.75               | 1.45 ± 0.52 | 3.54 ± 0.76 | 2.71 ± 0.88 | 2.91 ± 0.64 | 2.75 ± 0.62 | 2.56 ± 0.99 | 2.63 ± 0.91 |  |
| LGA                             | 90  | 19.3 | 2.06 ± 0.69               | 1.39 ± 0.43 | 3.54 ± 0.69 | 2.86 ± 0.83 | 2.88 ± 0.66 | 2.79 ± 0.57 | 2.64 ± 0.95 | 2.56 ± 0.87 |  |
| p-value                         |     |      | 0.961                     | 0.654       | 0.929       | 0.204       | 0.133       | 0.525       | 0.305       | 0.727       |  |
| Birthweight (g):                |     |      |                           |             |             |             |             |             |             |             |  |
| < 2500                          | 23  | 4.9  | 1.64 ± 0.45 <sup>a</sup>  | 1.39 ± 0.45 | 3.21 ± 0.70 | 2.78 ± 0.76 | 3.17 ± 0.73 | 2.62 ± 0.64 | 2.85 ± 1.14 | 2.64 ± 0.91 |  |
| 2500-3999                       | 401 | 85.9 | 2.07 ± 0.75 <sup>b</sup>  | 1.46 ± 0.52 | 3.56 ± 0.75 | 2.75 ± 0.88 | 2.91 ± 0.64 | 2.76 ± 0.61 | 2.57 ± 0.97 | 2.61 ± 0.90 |  |
| ≥ 4000                          | 43  | 9.2  | 2.02 ± 0.65 <sup>ab</sup> | 1.36 ± 0.40 | 3.51 ± 0.69 | 2.68 ± 0.76 | 2.81 ± 0.57 | 2.90 ± 0.59 | 2.60 ± 0.98 | 2.54 ± 0.86 |  |
| p-value                         |     |      | 0.016                     | 0.643       | 0.092       | 0.904       | 0.151       | 0.118       | 0.589       | 0.886       |  |
| Maternal BMI:                   |     |      |                           |             |             |             |             |             |             |             |  |
| < 18.5                          | 33  | 7.1  | 2.09 ± 0.78               | 1.56 ± 0.66 | 3.56 ± 0.65 | 2.71 ± 0.79 | 3.03 ± 0.52 | 2.80 ± 0.55 | 2.39 ± 0.95 | 2.63 ± 0.84 |  |
| 18.5-24.9                       | 286 | 61.2 | 2.01 ± 0.73               | 1.42 ± 0.50 | 3.53 ± 0.75 | 2.72 ± 0.86 | 2.92 ± 0.65 | 2.77 ± 0.58 | 2.63 ± 0.99 | 2.64 ± 0.92 |  |
| 25-29.9                         | 97  | 20.8 | 2.08 ± 0.76               | 1.47 ± 0.49 | 3.54 ± 0.77 | 2.79 ± 0.92 | 2.86 ± 0.64 | 2.75 ± 0.65 | 2.62 ± 1.00 | 2.59 ± 0.86 |  |
| ≥ 30                            | 51  | 10.9 | 2.13 ± 0.64               | 1.43 ± 0.47 | 3.54 ± 0.78 | 2.80 ± 0.89 | 2.93 ± 0.65 | 2.74 ± 0.71 | 2.44 ± 0.89 | 2.45 ± 0.86 |  |
| p-value                         |     |      | 0.486                     | 0.641       | 0.999       | 0.840       | 0.498       | 0.929       | 0.425       | 0.659       |  |
| Ever formula feeding:           |     |      |                           |             |             |             |             |             |             |             |  |
| no                              | 269 | 57.6 | 2.05 ± 0.75               | 1.46 ± 0.51 | 3.53 ± 0.73 | 2.72 ± 0.88 | 2.95 ± 0.63 | 2.78 ± 0.61 | 2.59 ± 0.97 | 2.65 ± 0.90 |  |

|                |     |      |             |             |             |             |             |             |             |             |
|----------------|-----|------|-------------|-------------|-------------|-------------|-------------|-------------|-------------|-------------|
| yes            | 198 | 42.4 | 2.04 ± 0.72 | 1.42 ± 0.50 | 3.58 ± 0.77 | 2.79 ± 0.85 | 2.86 ± 0.66 | 2.74 ± 0.61 | 2.59 ± 1.02 | 2.52 ± 0.87 |
| <b>p-value</b> |     |      | 0.950       | 0.419       | 0.372       | 0.362       | 0.233       | 0.484       | 0.965       | 0.144       |

<sup>a,b</sup> – values with different superscript letters are significantly different ( $p \leq 0.05$ ); FR – food responsiveness, EOE – emotional overeating, EF – enjoyment of food, DD – desire to drink, SR – satiety responsiveness, SE – slowness in eating, EUE – emotional undereating, FF – food fussiness; SGA – small for gestational age; AGA – appropriate for gestational age; LGA – large for gestational age; BMI – body mass index

**Table S5.** Univariate regression analysis predicting eating behaviors.

| Factors                                     | CEBQ subscales               |                          |                          |                               |                          |                          |                          |                             |
|---------------------------------------------|------------------------------|--------------------------|--------------------------|-------------------------------|--------------------------|--------------------------|--------------------------|-----------------------------|
|                                             | FR $\beta$ (95% CI)          | EOE $\beta$ (95% CI)     | EF $\beta$ (95% CI)      | DD $\beta$ (95% CI)           | SR $\beta$ (95% CI)      | SE $\beta$ (95% CI)      | EUE $\beta$ (95% CI)     | FF $\beta$ (95% CI)         |
| <b>Early feeding pattern:</b>               |                              |                          |                          |                               |                          |                          |                          |                             |
| longer ABF                                  | -0.160<br>(-0.260– -0.060)** | -0.031<br>(-0.132–0.071) | -0.046<br>(-0.147–0.055) | -0.194<br>(-0.294– -0.094)*** | 0.120<br>(0.019–0.221)   | 0.097<br>(-0.005–0.198)  | 0.030<br>(-0.071–0.132)  | -0.067<br>(-0.168–0.034)    |
| formula                                     | 0.038<br>(-0.063–0.138)      | -0.052<br>(-0.153–0.049) | -0.047<br>(-0.148–0.054) | 0.119<br>(0.019–0.219)*       | -0.022<br>(-0.123–0.079) | -0.074<br>(-0.175–0.027) | -0.022<br>(-0.124–0.079) | 0.019<br>(-0.082–0.120)     |
| longer EBF                                  | Ref                          | Ref                      | Ref                      | Ref                           | Ref                      | Ref                      | Ref                      | Ref                         |
| <b>R<sup>2</sup></b>                        | 0.02**                       | 0.01                     | 0.01                     | 0.03***                       | 0.01                     | 0.01                     | 0.00                     | 0.00                        |
| <b>CF method:</b>                           |                              |                          |                          |                               |                          |                          |                          |                             |
| BLW                                         | -0.015<br>(-0.126–0.097)     | -0.056<br>(-0.167–0.056) | 0.112<br>(0.003–0.222)*  | -0.108<br>(-0.219–0.003)      | 0.077<br>(-0.034–0.189)  | 0.003<br>(-0.108–0.114)  | -0.057<br>(-0.168–0.054) | -0.076<br>(-0.186–0.034)    |
| mixed                                       | 0.016<br>(-0.096–0.127)      | 0.074<br>(-0.037–0.186)  | 0.083<br>(-0.027–0.193)  | 0.007<br>(-0.104–0.118)       | -0.076<br>(-0.187–0.035) | -0.078<br>(-0.189–0.033) | 0.007<br>(-0.104–0.118)  | -0.126<br>(-0.235– -0.016)* |
| TSF                                         | Ref                          | Ref                      | Ref                      | Ref                           | Ref                      | Ref                      | Ref                      | Ref                         |
| <b>R<sup>2</sup></b>                        | 0.00                         | 0.00                     | 0.03***                  | 0.01                          | 0.00                     | 0.00                     | 0.00                     | 0.03***                     |
| <b>Types of complementary food pattern:</b> |                              |                          |                          |                               |                          |                          |                          |                             |
| homemade                                    | 0.008<br>(-0.083–0.100)      | 0.076<br>(-0.015–0.167)  | 0.070<br>(-0.020–0.161)  | -0.067<br>(-0.158–0.024)      | 0.112<br>(0.021–0.202)*  | 0.040<br>(-0.051–0.131)  | -0.046<br>(-0.137–0.045) | -0.056<br>(-0.147–0.035)    |
| commercial                                  | Ref                          | Ref                      | Ref                      | Ref                           | Ref                      | Ref                      | Ref                      | Ref                         |
| <b>R<sup>2</sup></b>                        | 0.00                         | 0.00                     | 0.00                     | 0.00                          | 0.010*                   | -0.00                    | 0.00                     | 0.00                        |

| <b>Mealtime environment pattern:</b> |                         |                          |                               |                              |                          |                          |                          |                          |
|--------------------------------------|-------------------------|--------------------------|-------------------------------|------------------------------|--------------------------|--------------------------|--------------------------|--------------------------|
| distracted                           | 0.015<br>(-0.119–0.148) | 0.076<br>(-0.057–0.209)  | -0.240<br>(-0.368– -0.112)*** | 0.185<br>(0.053–0.317)**     | 0.103<br>(-0.030–0.236)  | 0.178<br>(0.045–0.310)** | 0.137<br>(0.000–0.270)   | 0.185<br>(0.054–0.316)** |
| separated                            | 0.000<br>(-0.133–0.133) | -0.059<br>(-0.192–0.074) | -0.057<br>(-0.185–0.070)      | -0.191<br>(-0.323– -0.059)** | -0.020<br>(-0.153–0.112) | -0.116<br>(-0.248–0.016) | -0.115<br>(-0.248–0.017) | 0.004<br>(-0.127–0.135)  |
| family                               | Ref                     | Ref                      | Ref                           | Ref                          | Ref                      | Ref                      | Ref                      | Ref                      |
| <b>R<sup>2</sup></b>                 | 0.00                    | 0.00                     | 0.08***                       | 0.02*                        | 0.00                     | 0.01*                    | 0.00                     | 0.03***                  |

FR – food responsiveness, EOE – emotional overeating, EF – enjoyment of food, DD – desire to drink, SR – satiety responsiveness, SE – slowness in eating, EUE – emotional under-eating, FF – food fussiness; CF – complementary feeding; Early feeding patterns: longer ABF – currently breastfed, EBF duration ~4.1 months, age at CFI ~5.6 months; formula – not currently breastfed, EBF duration ~0.3 months, age at CFI ~4.3 months; longer EBF – not currently breastfed, EBF duration ~5.4 months, age at CFI ~5.6 months; BLW – baby-led weaning; TSF – tablespoon feeding; \* $p \leq 0.05$ ; \*\* $p \leq 0.01$ ; \*\*\* $p \leq 0.001$
